# Supplementary material for: Linker-Free Synthesis of Antimicrobial Peptides Using a Novel Cleavage Reagent: Characterisation of the Molecular and Ionic Composition by nanoESI-HR MS
Source: MDPI journal article supplement (doi:10.3390/pharmaceutics15041310), 2023-04-21
Supplement: s1 [file s1]

## Supplementary Information

**Table S1.** Detected polymyxin ion clusters obtained by nanoESI-HR MS in negative mode.

| Compound                                 | Chemical formula                                                                                | Theoretical mass | m/z        | Delta (ppm) |
|------------------------------------------|-------------------------------------------------------------------------------------------------|------------------|------------|-------------|
| [PxB <sub>3</sub> +Br] <sup>-</sup>      | C <sub>55</sub> H <sub>96</sub> O <sub>13</sub> N <sub>16</sub> Br                              | 1267.65316       | 1267.65166 | -1.19       |
| [PxB <sub>3</sub> +2Br+H] <sup>-</sup>   | C <sub>55</sub> H <sub>97</sub> O <sub>13</sub> N <sub>16</sub> Br <sub>2</sub>                 | 1347.57933       | 1347.57566 | -2.72       |
| [PxB <sub>3</sub> +3Br+2H] <sup>-</sup>  | C <sub>55</sub> H <sub>98</sub> O <sub>13</sub> N <sub>16</sub> Br <sub>3</sub>                 | 1427.50549       | 1427.50214 | -2.35       |
| [PxB <sub>3</sub> +4Br+3H] <sup>-</sup>  | C <sub>55</sub> H <sub>99</sub> O <sub>13</sub> N <sub>16</sub> Br <sub>4</sub>                 | 1507.43165       | 1507.42861 | -2.02       |
| [PxB <sub>3</sub> +5Br+4H] <sup>-</sup>  | C <sub>55</sub> H <sub>100</sub> O <sub>13</sub> N <sub>16</sub> Br <sub>5</sub>                | 1587.35781       | 1587.35352 | -2.70       |
| [PxB <sub>3</sub> +2Br+Na] <sup>-</sup>  | C <sub>55</sub> H <sub>96</sub> O <sub>13</sub> N <sub>16</sub> Br <sub>2</sub> Na              | 1369.56078       | 1369.55790 | -2.10       |
| [PxB <sub>3</sub> +3Br+2Na] <sup>-</sup> | C <sub>55</sub> H <sub>96</sub> O <sub>13</sub> N <sub>16</sub> Br <sub>3</sub> Na <sub>2</sub> | 1471.46889       | 1471.46340 | -3.73       |
| [PxB <sub>3</sub> +4Br+3Na] <sup>-</sup> | C <sub>55</sub> H <sub>96</sub> O <sub>13</sub> N <sub>16</sub> Br <sub>4</sub> Na <sub>3</sub> | 1573.37699       | 1573.37640 | -0.37       |
| [PxB <sub>3</sub> +Br] <sup>-</sup>      | C <sub>55</sub> H <sub>96</sub> O <sub>13</sub> N <sub>16</sub> Br                              | 1267.65316       | 1267.65352 | 0.28        |
| [PxB <sub>3</sub> +TFA] <sup>-</sup>     | C <sub>57</sub> H <sub>96</sub> O <sub>15</sub> N <sub>16</sub> F <sub>3</sub>                  | 1301.71986       | 1301.72247 | 2.00        |
| [PxB <sub>3</sub> +2TFA+H] <sup>-</sup>  | C <sub>59</sub> H <sub>97</sub> O <sub>17</sub> N <sub>16</sub> F <sub>6</sub>                  | 1415.71273       | 1415.70990 | -2.00       |
| [PxB <sub>3</sub> +3TFA+2H] <sup>-</sup> | C <sub>61</sub> H <sub>98</sub> O <sub>19</sub> N <sub>16</sub> F <sub>9</sub>                  | 1529.70559       | 1529.70270 | -1.89       |
| [PxB <sub>3</sub> +4TFA+3H] <sup>-</sup> | C <sub>63</sub> H <sub>99</sub> O <sub>21</sub> N <sub>16</sub> F <sub>12</sub>                 | 1643.69846       | 1643.69595 | -1.52       |
| [PxB <sub>3</sub> +5TFA+4H] <sup>-</sup> | C <sub>65</sub> H <sub>100</sub> O <sub>23</sub> N <sub>16</sub> F <sub>15</sub>                | 1757.69132       | 1757.68656 | -2.71       |
| [PxB <sub>3</sub> +Cl] <sup>-</sup>      | C <sub>55</sub> H <sub>96</sub> O <sub>13</sub> N <sub>16</sub> Cl                              | 1223.70368       | 1223.70517 | 1.22        |
| [PxB <sub>3</sub> +2Cl+H] <sup>-</sup>   | C <sub>55</sub> H <sub>97</sub> O <sub>13</sub> N <sub>16</sub> Cl <sub>2</sub>                 | 1259.68036       | 1259.67870 | -1.31       |
| [PxB <sub>3</sub> +3Cl+2H] <sup>-</sup>  | C <sub>55</sub> H <sub>98</sub> O <sub>13</sub> N <sub>16</sub> Cl <sub>3</sub>                 | 1295.65703       | 1295.65562 | -1.09       |
| [PxB <sub>3</sub> +4Cl+3H] <sup>-</sup>  | C <sub>55</sub> H <sub>99</sub> O <sub>13</sub> N <sub>16</sub> Cl <sub>4</sub>                 | 1331.63371       | 1331.63487 | 0.87        |
| [PxB <sub>3</sub> +5Cl+4H] <sup>-</sup>  | C <sub>55</sub> H <sub>100</sub> O <sub>13</sub> N <sub>16</sub> Cl <sub>5</sub>                | 1367.61039       | 1367.61386 | 2.54        |

**Table S2:** Detected polymyxin, RR4, or dusquetide ion clusters obtained by a quadrupole-resolution instrument tuned to detect negative ion clusters.

| Compound                                | Chemical formula                                                                | Theoretical mass | m/z     | Delta (ppm) |
|-----------------------------------------|---------------------------------------------------------------------------------|------------------|---------|-------------|
| [PxB <sub>3</sub> +Br] <sup>-</sup>     | C <sub>55</sub> H <sub>96</sub> O <sub>13</sub> N <sub>16</sub> Br              | 1267.65316       | 1268.23 | 455.05      |
| [PxB <sub>3</sub> +2Br+H] <sup>-</sup>  | C <sub>55</sub> H <sub>97</sub> O <sub>13</sub> N <sub>16</sub> Br <sub>2</sub> | 1347.57933       | 1348.37 | 586.73      |
| [PxB <sub>3</sub> +3Br+2H] <sup>-</sup> | C <sub>55</sub> H <sub>98</sub> O <sub>13</sub> N <sub>16</sub> Br <sub>3</sub> | 1427.50549       | 1430.37 | 2006.65     |
| [PxB <sub>3</sub> +4Br+3H] <sup>-</sup> | C <sub>55</sub> H <sub>99</sub> O <sub>13</sub> N <sub>16</sub> Br <sub>4</sub> | 1507.43165       | 1511.97 | 3010.65     |
| [PxB <sub>3</sub> +TFA] <sup>-</sup>    | C <sub>57</sub> H <sub>96</sub> O <sub>15</sub> N <sub>16</sub> F <sub>3</sub>  | 1301.71986       | 1302.45 | 560.90      |
| [PxB <sub>3</sub> +Cl] <sup>-</sup>     | C <sub>55</sub> H <sub>96</sub> O <sub>13</sub> N <sub>16</sub> Cl              | 1223.70368       | 1224.34 | 519.00      |
| [RR4+Br] <sup>-</sup>                   | C <sub>44</sub> H <sub>76</sub> N <sub>16</sub> O <sub>7</sub> Br               | 1019.52663       | 1019.7  | 170.05      |
| [RR4+2Br+H] <sup>-</sup>                | C <sub>44</sub> H <sub>77</sub> N <sub>16</sub> O <sub>7</sub> Br <sub>2</sub>  | 1099.45279       | 1099.9  | 406.76      |
| [RR4+3Br+2H] <sup>-</sup>               | C <sub>44</sub> H <sub>78</sub> N <sub>16</sub> O <sub>7</sub> Br <sub>3</sub>  | 1179.37895       | 1179.9  | 441.80      |
| [RR4+4Br+3H] <sup>-</sup>               | C <sub>44</sub> H <sub>79</sub> N <sub>16</sub> O <sub>7</sub> Br <sub>4</sub>  | 1259.30511       | 1263.1  | 3013.48     |
| [Dusquetide+Br] <sup>-</sup>            | C <sub>25</sub> H <sub>47</sub> N <sub>9</sub> O <sub>5</sub> Br                | 632.28835        | 632.63  | 540.34      |
| [Dusquetide+2Br+H] <sup>-</sup>         | C <sub>25</sub> H <sub>48</sub> N <sub>9</sub> O <sub>5</sub> Br <sub>2</sub>   | 712.21451        | 712.60  | 541.26      |
| [Dusquetide+TFA] <sup>-</sup>           | C <sub>27</sub> H <sub>47</sub> N <sub>9</sub> O <sub>7</sub> F <sub>3</sub>    | 666.35506        | 666.73  | 562.67      |
| [Dusquetide+2TFA+2H] <sup>-</sup>       | C <sub>29</sub> H <sub>48</sub> N <sub>9</sub> O <sub>9</sub> F <sub>6</sub>    | 780.34792        | 780.79  | 566.52      |
| [Dusquetide+Br+TFA+2H] <sup>-</sup>     | C <sub>27</sub> H <sub>48</sub> N <sub>9</sub> O <sub>7</sub> F <sub>3</sub> Br | 746.28122        | 746.72  | 587.96      |

**Table S3:** The ESI-MS characterisation (positive mode) was used for the synthetic polymyxins B3, RR4, and dusquetide peptides obtained in a Waters ESI-MS Micromass ZQ 4000 spectrometer.

| Compound                             | Chemical formula                                                | Theoretical mass | m/z     | Delta (ppm) |
|--------------------------------------|-----------------------------------------------------------------|------------------|---------|-------------|
| [PxB <sub>3</sub> +H] <sup>+</sup>   | C <sub>55</sub> H <sub>97</sub> O <sub>13</sub> N <sub>16</sub> | 1189.74210       | 1190.11 | 309.23      |
| [PxB <sub>3</sub> +2H] <sup>2+</sup> | C <sub>55</sub> H <sub>98</sub> O <sub>13</sub> N <sub>16</sub> | 595.37497        | 595.68  | 512.33      |
| [RR4+H] <sup>+</sup>                 | C <sub>44</sub> H <sub>77</sub> O <sub>7</sub> N <sub>16</sub>  | 941.61611        | 941.8   | 6567.32     |
| [RR4+2H] <sup>2+</sup>               | C <sub>44</sub> H <sub>78</sub> O <sub>7</sub> N <sub>16</sub>  | 471.31197        | 471.1   | -449.74     |
| [RR4+3H] <sup>3+</sup>               | C <sub>44</sub> H <sub>79</sub> O <sub>7</sub> N <sub>16</sub>  | 314.54392        | 314.6   | 178.29      |
| [Dusquetide+H] <sup>+</sup>          | C <sub>25</sub> H <sub>48</sub> N <sub>9</sub> O <sub>5</sub>   | 554.37784        | 554.64  | 472.89      |

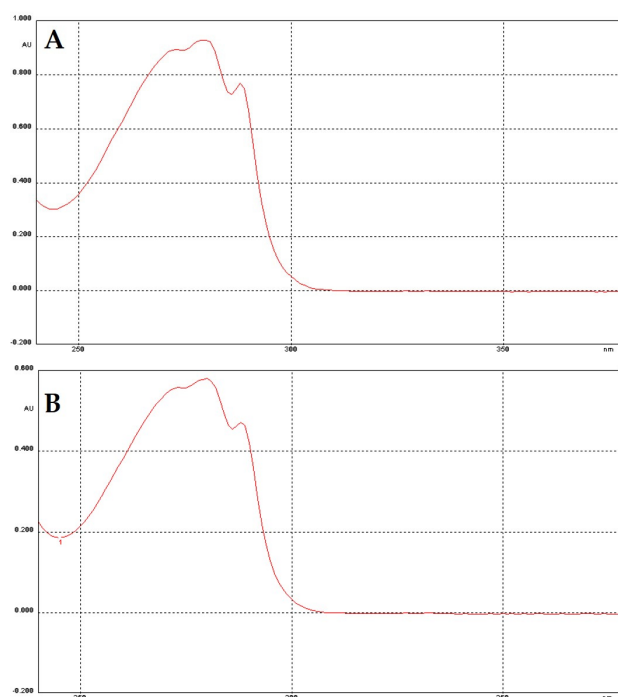

**Figure S1:** Absorption spectrum of tryptophan. A) H-Trp(OAll)·HCl; B) RR4 heptapeptide after cleavage with TFA/TES/Br<sub>2</sub> (82.5:15:2.5, v/v/v) for 45 minutes.

The following images correspond to the study of the isotopic distribution of the different species obtained by ESI-HR MS of synthetic  $PxB_3$ :

**$PxB_3$  after cleavage with HBr (a detailed study of Figure 7A)**

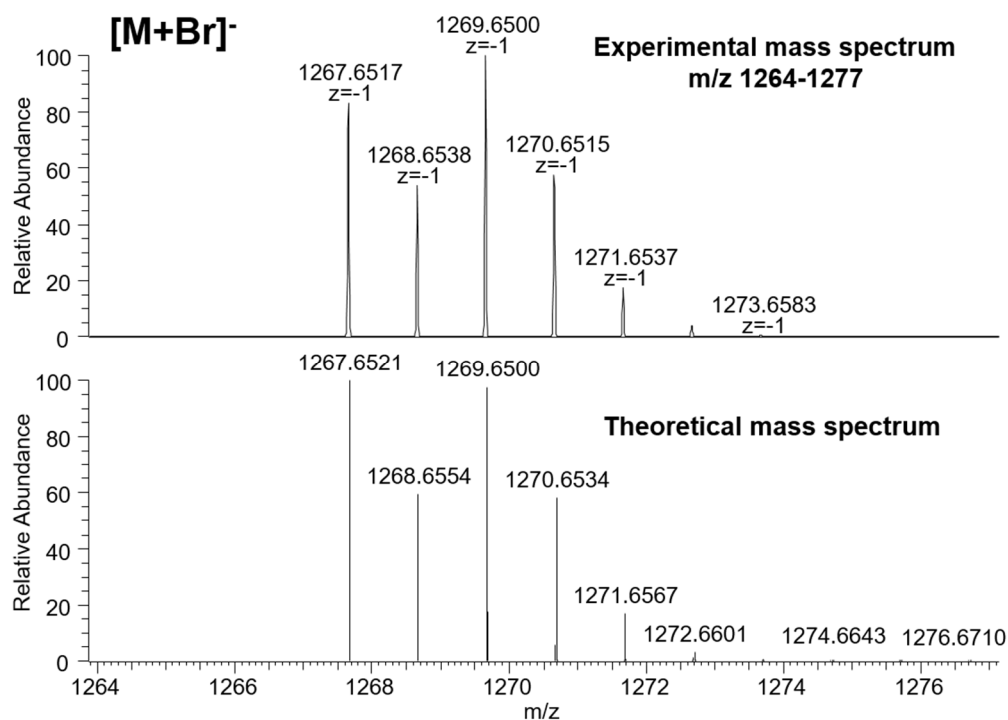

**Figure S2:** Experimental and theoretical isotopic distribution of the peak corresponding to  $[M + Br]^-$ ,  $C_{55}H_{96}O_{13}N_{16}Br$ .

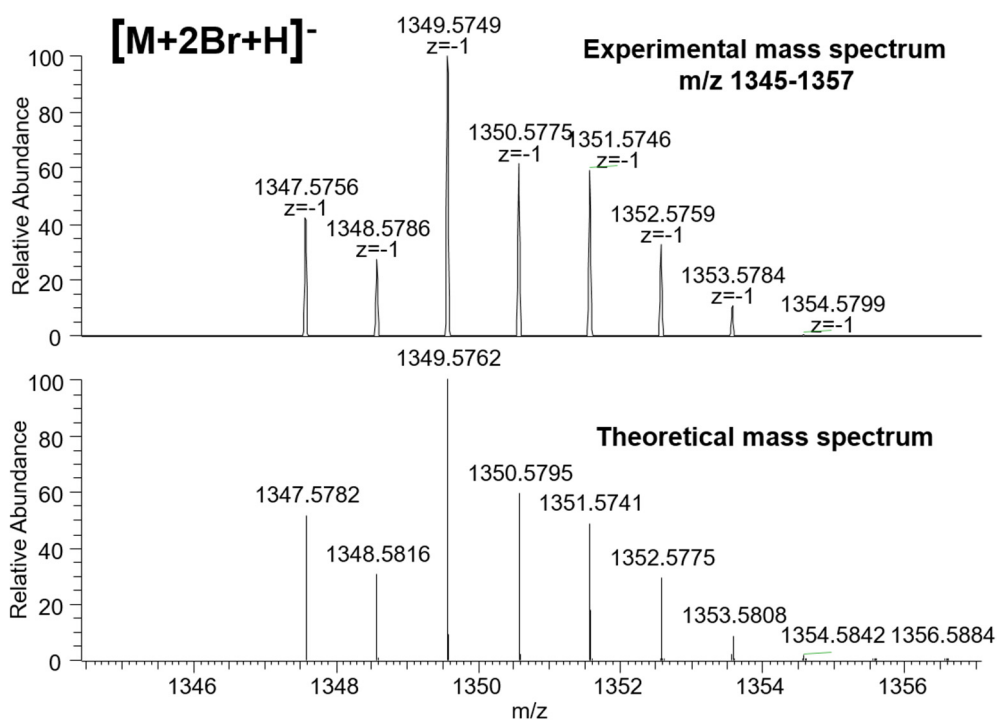

**Figure S3:** Experimental and theoretical isotopic distribution of the peak corresponding to  $[M + 2Br + H]^-$ ,  $C_{55}H_{97}O_{13}N_{16}Br_2$ .

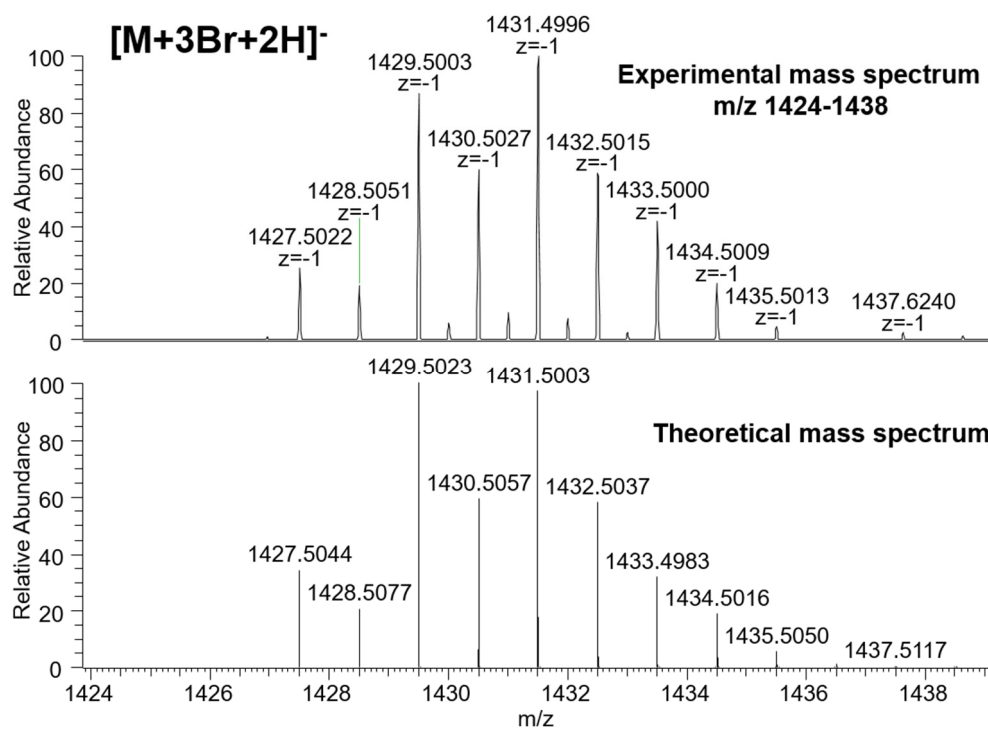

**Figure S4:** Experimental and theoretical isotopic distribution of the peak corresponding to  $[M + 3\text{Br} + 2\text{H}]^-$ ,  $\text{C}_{55}\text{H}_{98}\text{O}_{13}\text{N}_{16}\text{Br}_3$ .

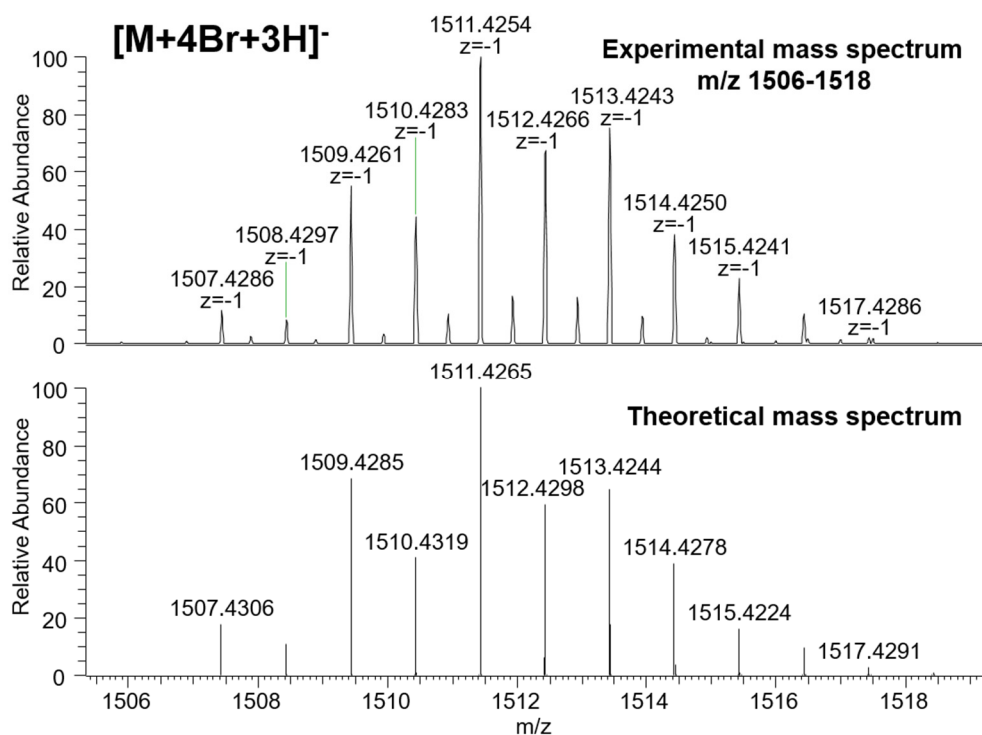

**Figure S5:** Experimental and theoretical isotopic distribution of the peak corresponding to  $[M + 4\text{Br} + 3\text{H}]^-$ ,  $\text{C}_{55}\text{H}_{99}\text{O}_{13}\text{N}_{16}\text{Br}_4$ .

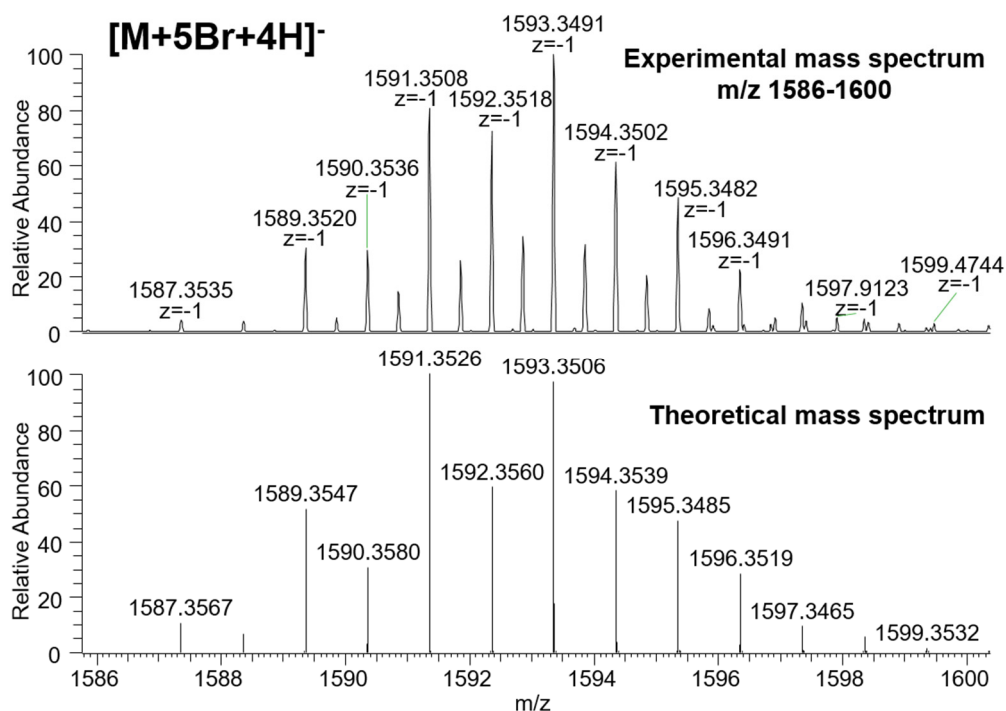

**Figure S6:** Experimental and theoretical isotopic distribution of the peak corresponding to  $[M + 5Br + 4H]^-$ ,  $C_{55}H_{100}O_{13}N_{16}Br_5$ .

$PxB_3$  after purification in presence of 0.1 % TFA (a detailed study of Figure 7B):

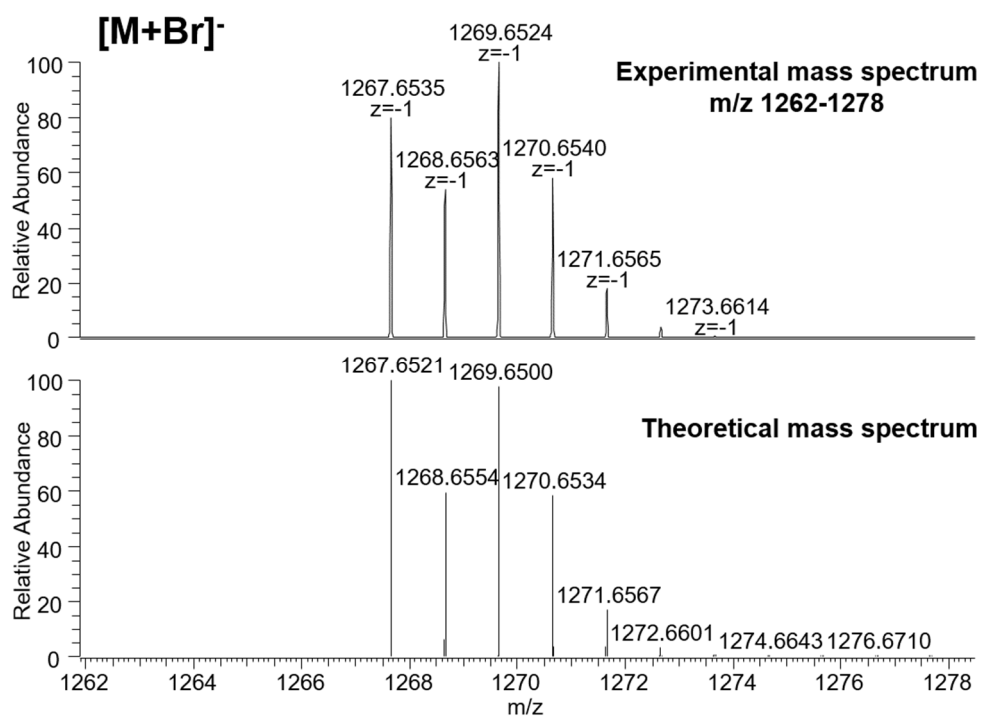

**Figure S7:** Experimental and theoretical isotopic distribution of the peak corresponding to  $[M + Br]^-$ ,  $C_{55}H_{96}O_{13}N_{16}Br$ .

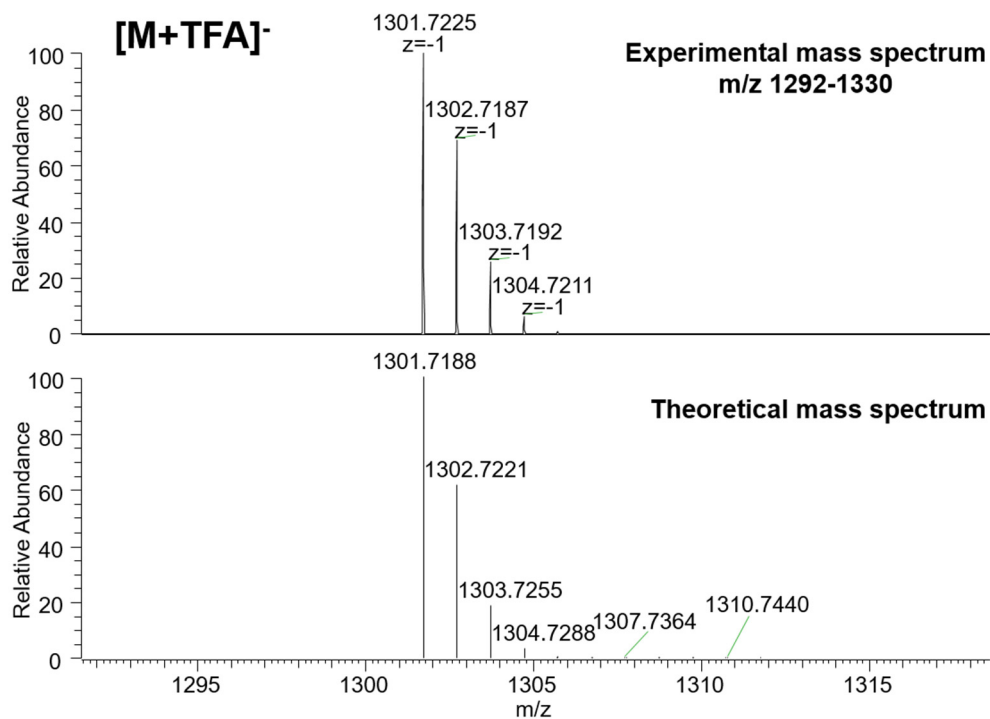

**Figure S8:** Experimental and theoretical isotopic distribution of the peak corresponding to  $[M + \text{TFA}]^-$ ,  $\text{C}_{57}\text{H}_{96}\text{O}_{15}\text{N}_{16}\text{F}_3$ .

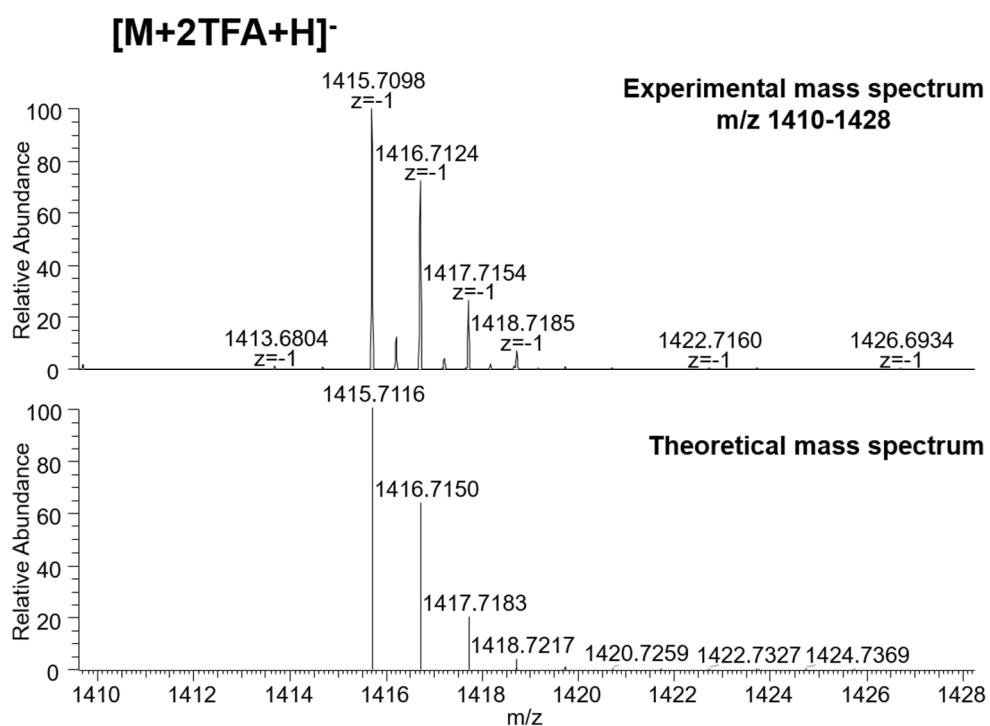

**Figure S9:** Experimental and theoretical isotopic distribution of the peak corresponding to  $[M + 2\text{TFA} + \text{H}]^-$ ,  $\text{C}_{59}\text{H}_{97}\text{O}_{17}\text{N}_{16}\text{F}_6$ .

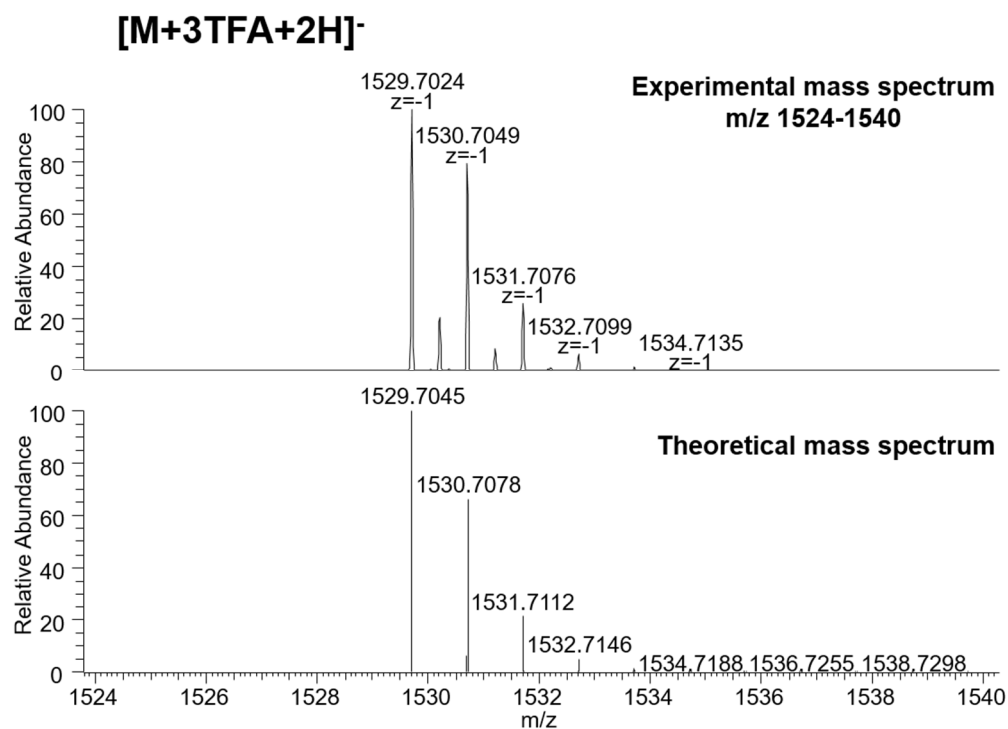

**Figure S10:** Experimental and theoretical isotopic distribution of the peak corresponding to  $[M + 3\text{TFA} + 2\text{H}]^-$ ,  $\text{C}_{61}\text{H}_{98}\text{O}_{19}\text{N}_{16}\text{F}_9$ .

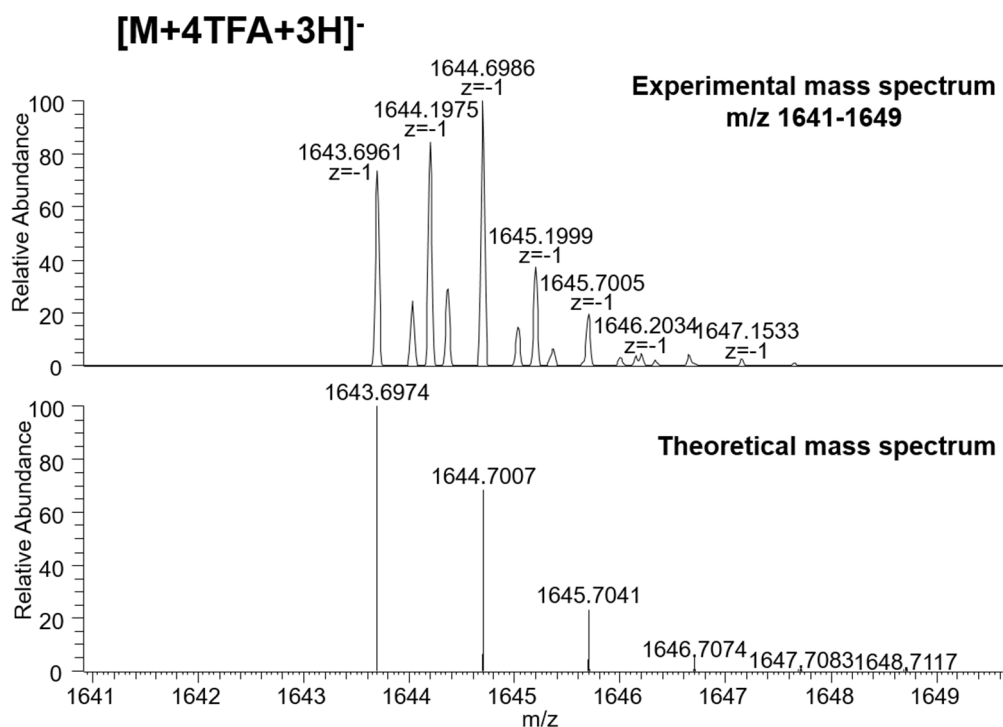

**Figure S11:** Experimental and theoretical isotopic distribution of the peak corresponding to  $[M + 4\text{TFA} + 3\text{H}]^-$ ,  $\text{C}_{63}\text{H}_{99}\text{O}_{21}\text{N}_{16}\text{F}_{12}$ .

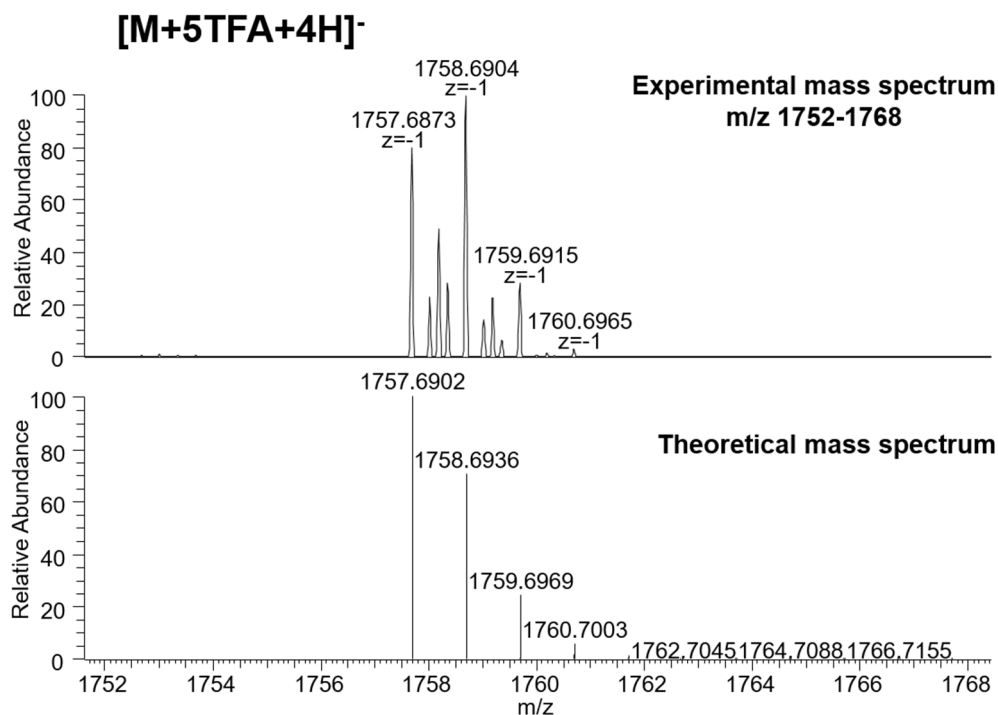

**Figure S12:** Experimental and theoretical isotopic distribution of the peak corresponding to  $[M + 5TFA + 4H]^-$ ,  $C_{65}H_{100}O_{23}N_{16}F_{15}$ .

**PxB<sub>3</sub> after lyophilization with HCl 8 mM (a detailed study of Figure 7C):**

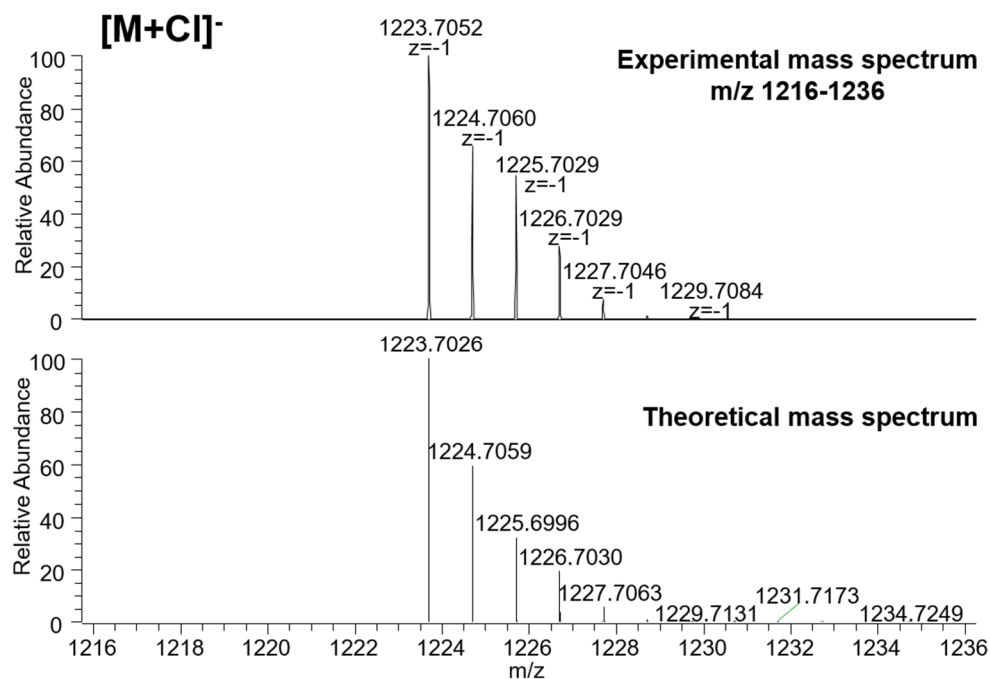

**Figure S13:** Experimental and theoretical isotopic distribution of the peak corresponding to  $[M + Cl]^-$ ,  $C_{55}H_{96}O_{13}N_{16}Cl$ .



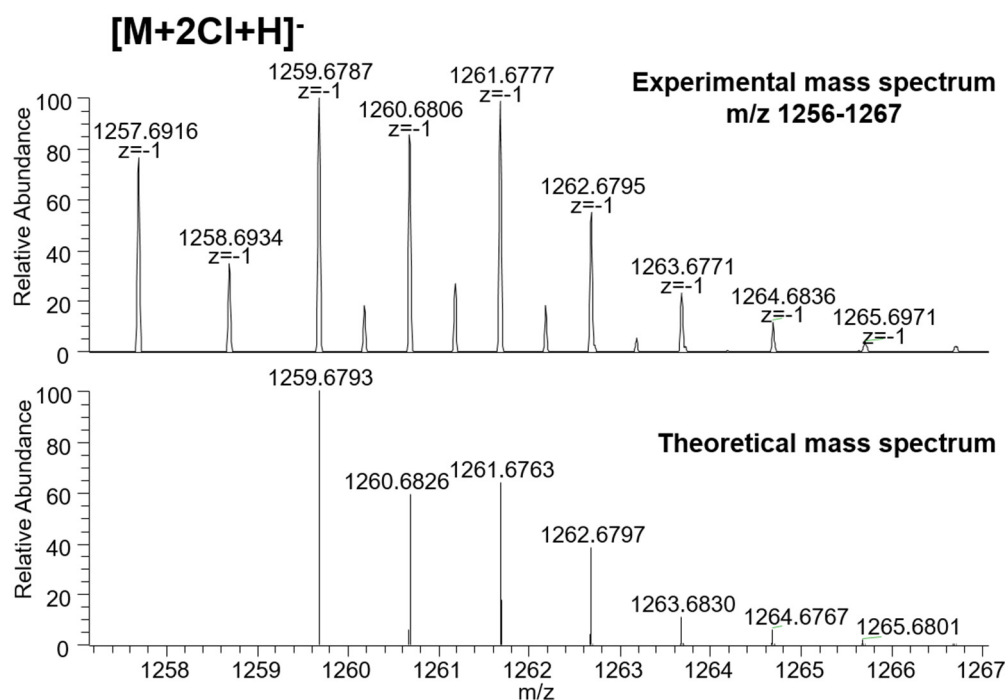

**Figure S14:** Experimental and theoretical isotopic distribution of the peak corresponding to  $[M + 2Cl + H]^-$ ,  $C_{55}H_{97}O_{13}N_{16}Cl_2$ .

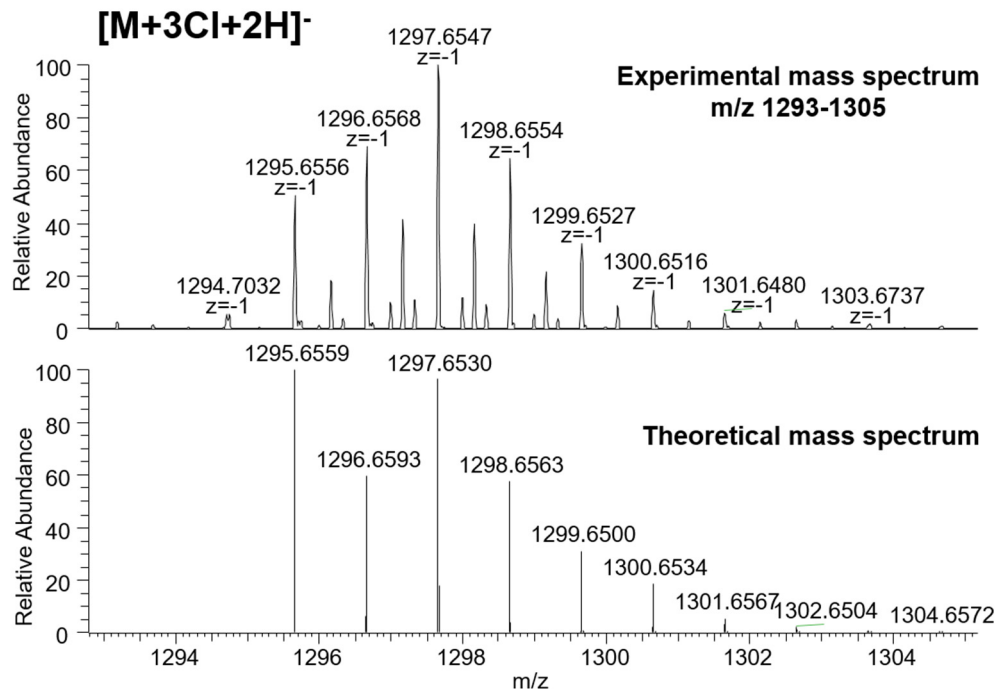

**Figure S15:** Experimental and theoretical isotopic distribution of the peak corresponding to  $[M + 3Cl + 2H]^-$ ,  $C_{55}H_{98}O_{13}N_{16}Cl_3$ .

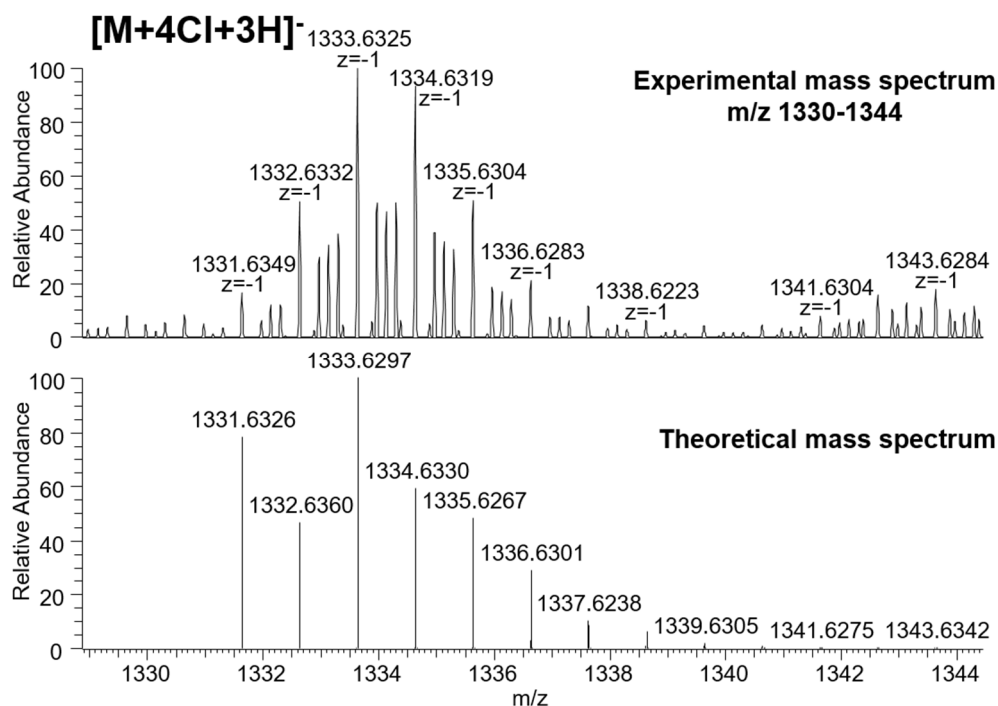

**Figure S16:** Experimental and theoretical isotopic distribution of the peak corresponding to  $[M + 4Cl + 3H]^-$ ,  $C_{55}H_{99}O_{13}N_{16}Cl_4$ .

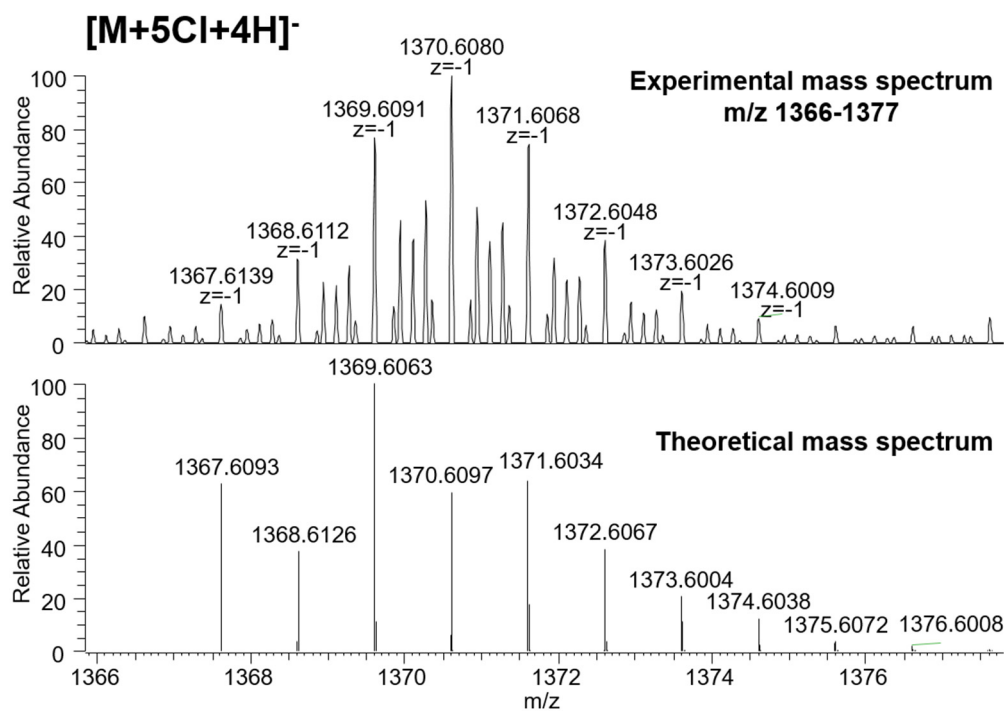

**Figure S17:** Experimental and theoretical isotopic distribution of the peak corresponding to  $[M + 5Cl + 4H]^-$ ,  $C_{55}H_{100}O_{13}N_{16}Cl_5$ .

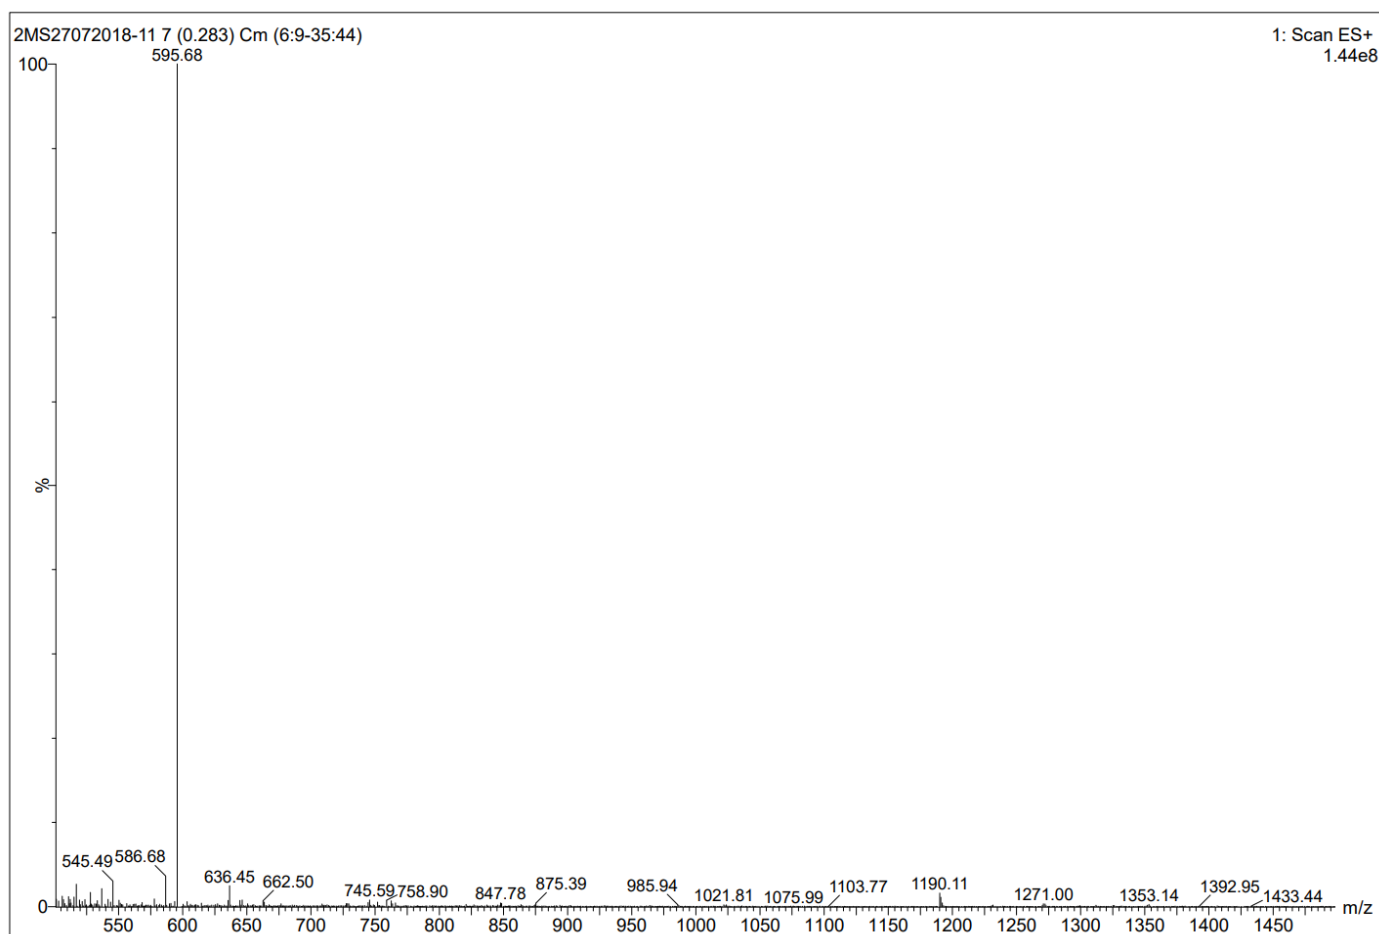

**Figure S18:** Spectra obtained by ESI-MS in positive mode for polymyxin B<sub>3</sub> peptide.

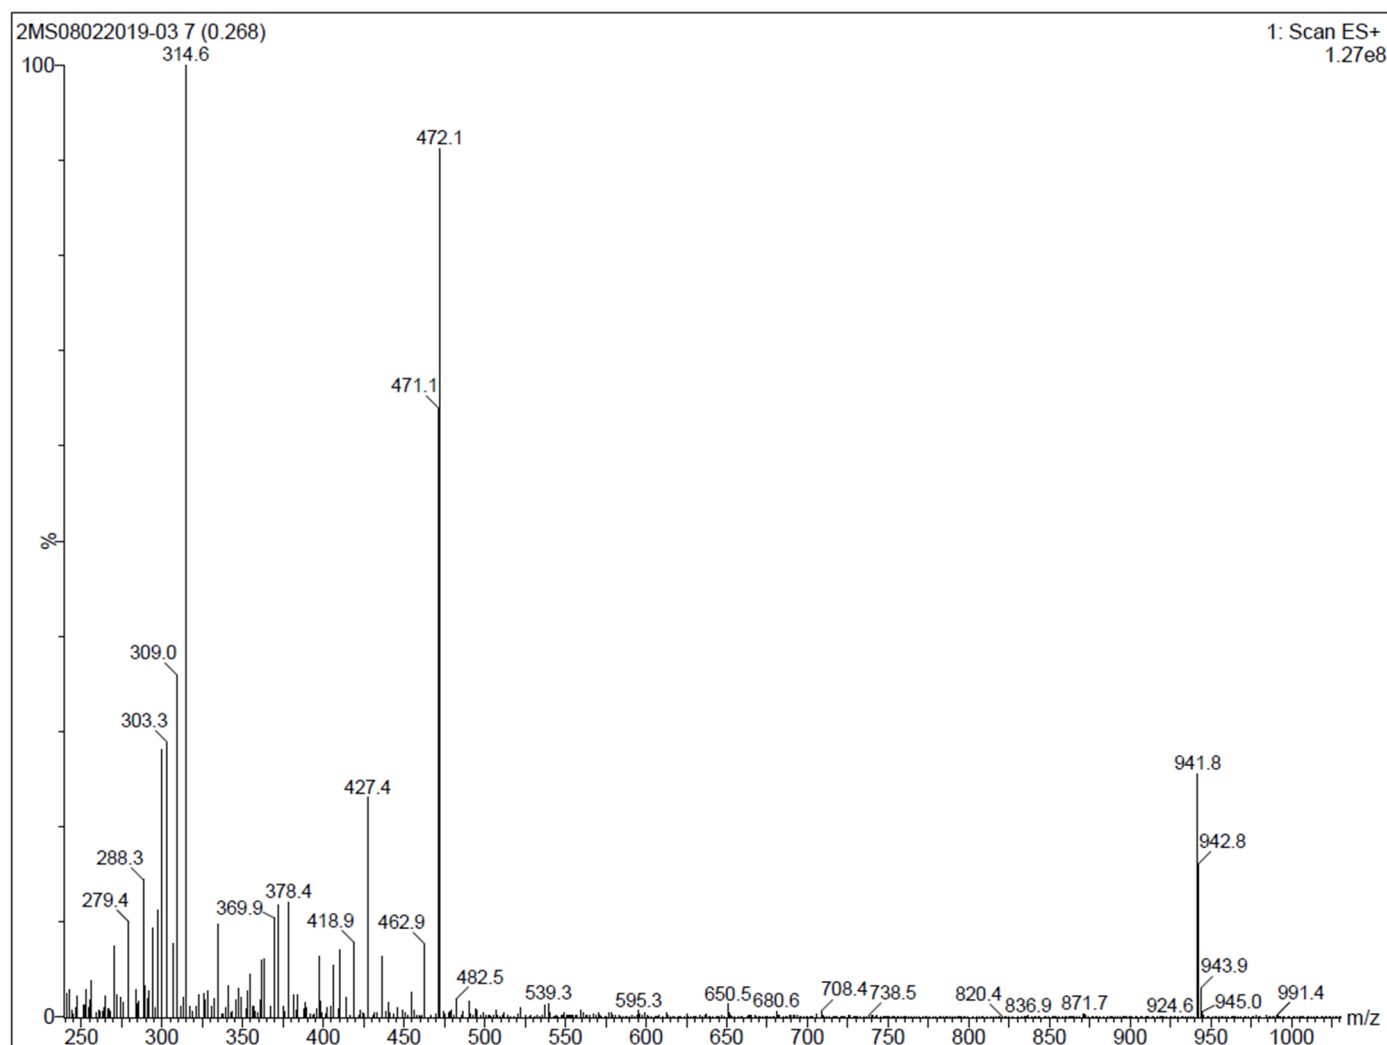

**Figure S19:** Spectra obtained by ESI-MS in positive mode for RR4 heptapeptide.

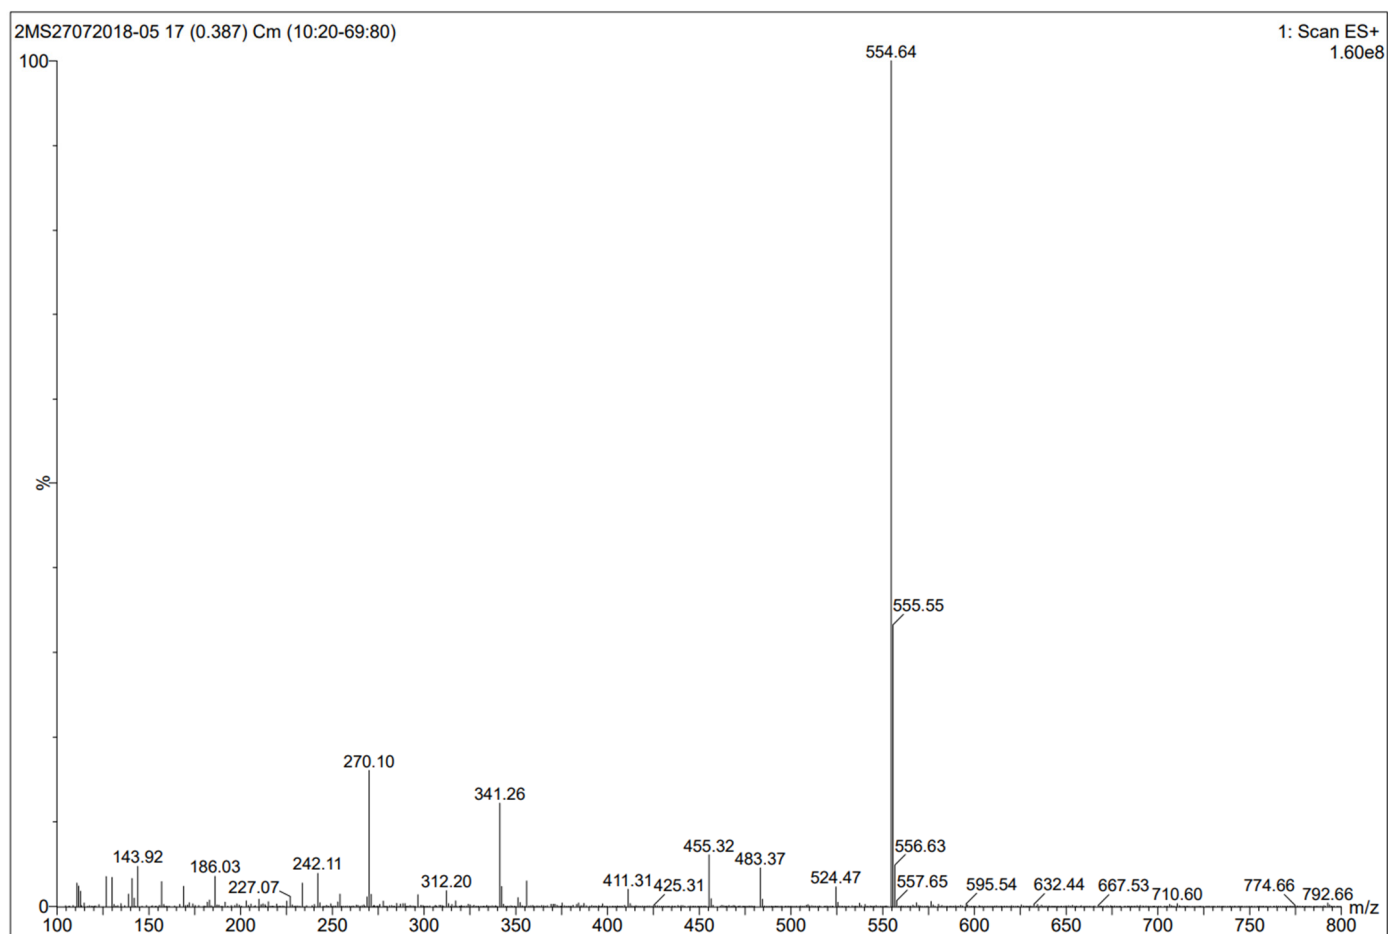

**Figure S20:** Spectra obtained by ESI-MS in positive mode for the dusquetide peptide.
